# Supplementary material for: Low temperature combustion synthesis of nitrogen-doped graphene for metal-free catalytic oxidation
Source: Royal Society of Chemistry journal article supplement (doi:10.1039/c4ta05940a), 2014-12-19
Supplement: c4ta05940a1.pdf [file c4ta05940a1.pdf]

Electronic Supplementary Information (ESI) for

## Low temperature combustion synthesis of nitrogen-doped graphene for metal-free catalytic oxidation

Stacey Indrawirawan, Hongqi Sun\*, Xiaoguang Duan, Shaobin Wang\*

Department of Chemical Engineering, Curtin University, GPO Box U1987, Perth, WA 6845, Australia

\*Correspondence Authors

Email: shaobin.wang@curtin.edu.au (S. Wang), h.sun@curtin.edu.au (H. Sun)

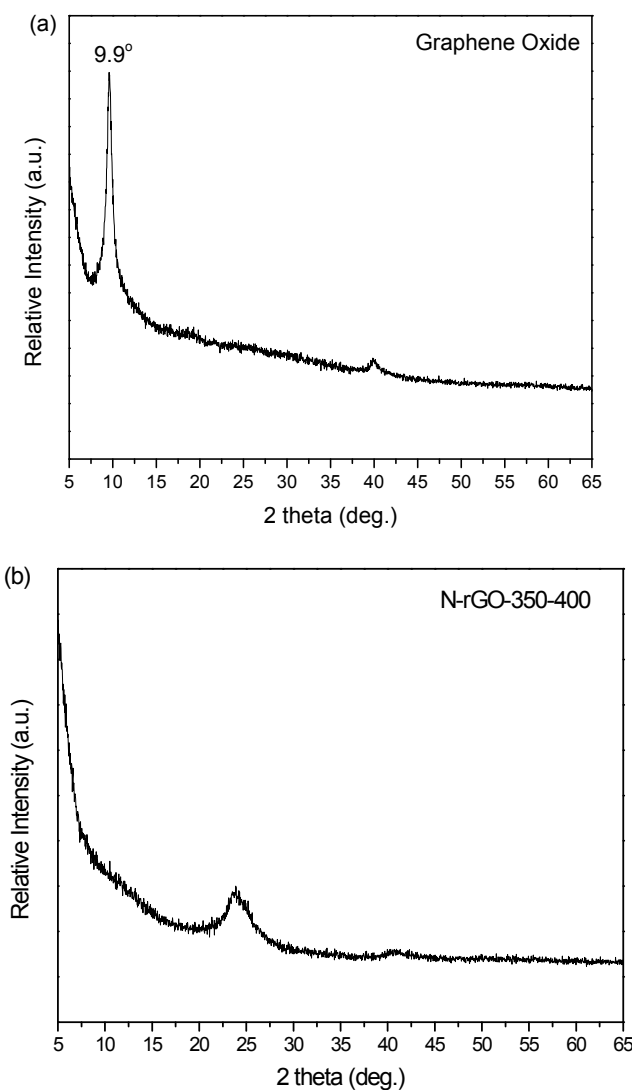

Figure S1 XRD patterns of (a) graphene oxide and (b) N-rGO-350-400.

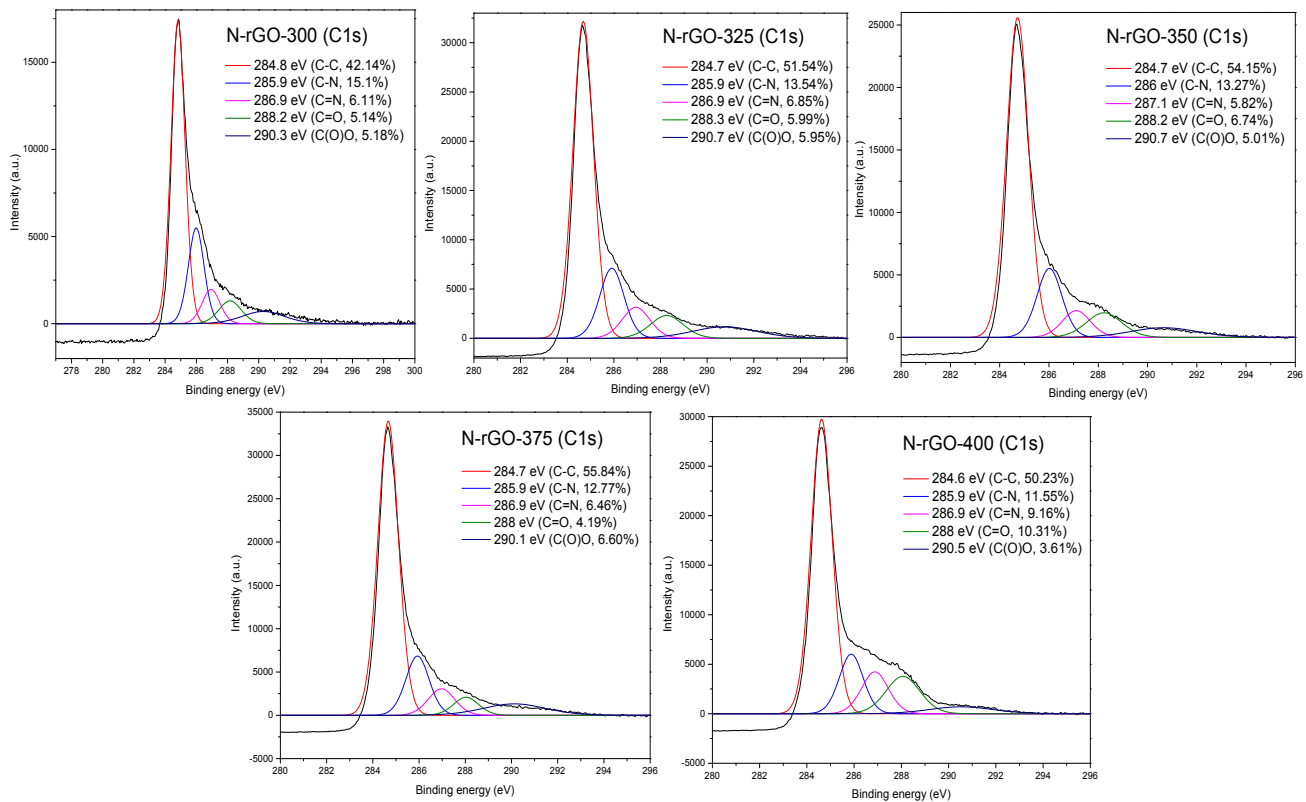

**Figure S2** XPS C 1s spectra of N-rGO synthesized at different thermal annealing temperatures.

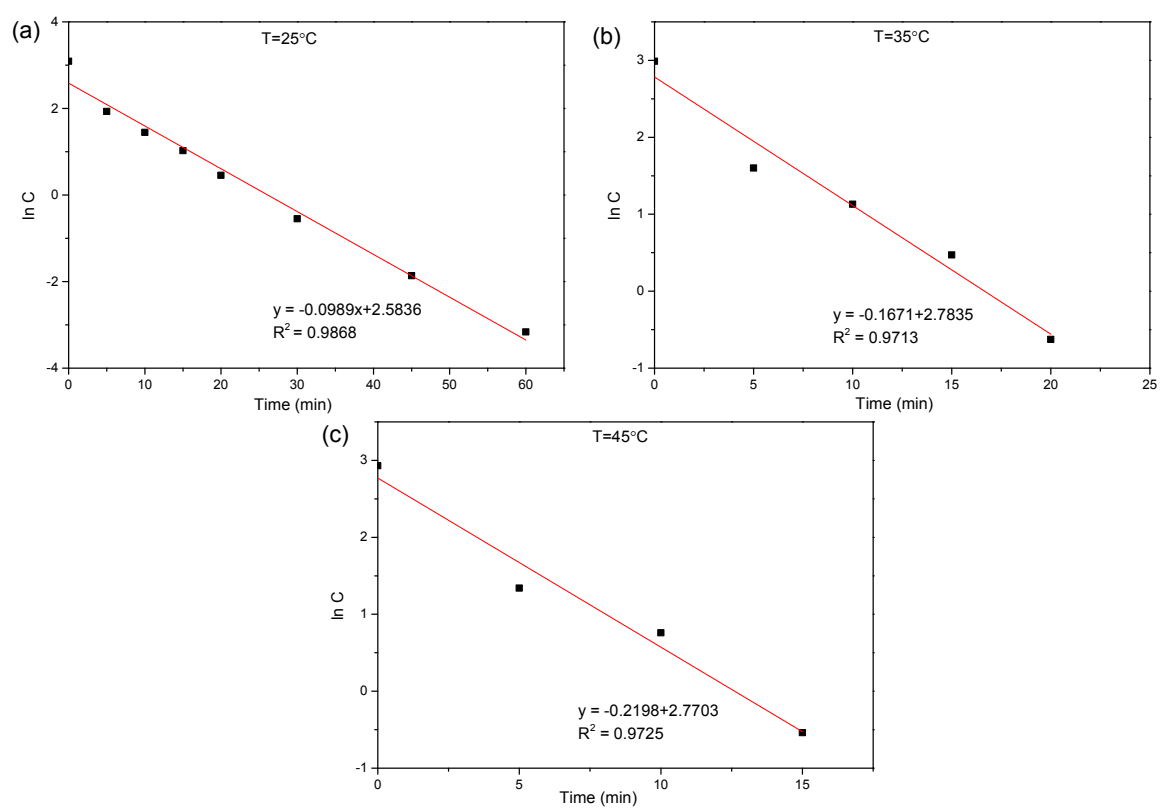

**Figure S3** First order kinetics of N-rGO-350 at 25, 35 and 45 °C.
